# Supplementary material for: How Does Electronic Polarizability or Scaled-Charge Affect the Interfacial Properties of Room Temperature Ionic Liquids?
Source: PubMed Central journal article supplement — J Phys Chem B. 2023 Jan 26;127(5):1264–75. doi: 10.1021/acs.jpcb.2c07981 (PMC9924258; doi:10.1021/acs.jpcb.2c07981), 2023-01-26
Supplement: jp2c07981_si_001.pdf [file jp2c07981_si_001.pdf]

*Supporting Information for*

**How Does Electronic Polarizability or Scaled-Charge Affect the Interfacial Properties of Room Temperature Ionic Liquids?**

*Sijia Chen and Gregory A. Voth\**

Department of Chemistry, Chicago Center for Theoretical Chemistry, The James Franck Institute, and Institute for Biophysical Dynamics, The University of Chicago, Chicago, IL 60637

\*Email: [gavoth@uchicago.edu](mailto:gavoth@uchicago.edu)

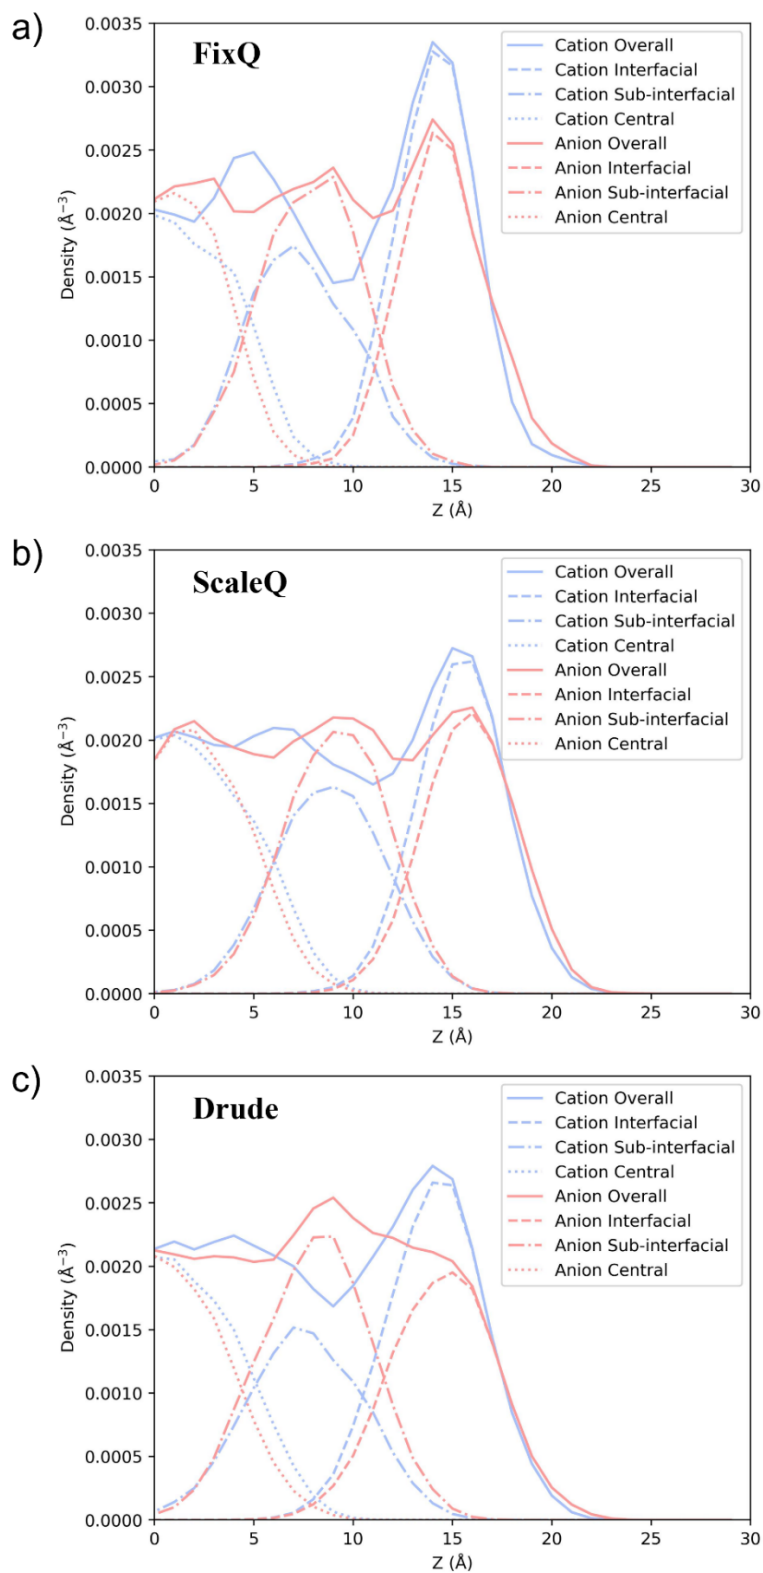

**Figure S1.** Number density profiles for the center of mass (COM) of cations and anions using a) FixQ, b) ScaleQ, and c) Drude models, with the liquid phase thickness of  $\sim 40$   $\text{\AA}$ .

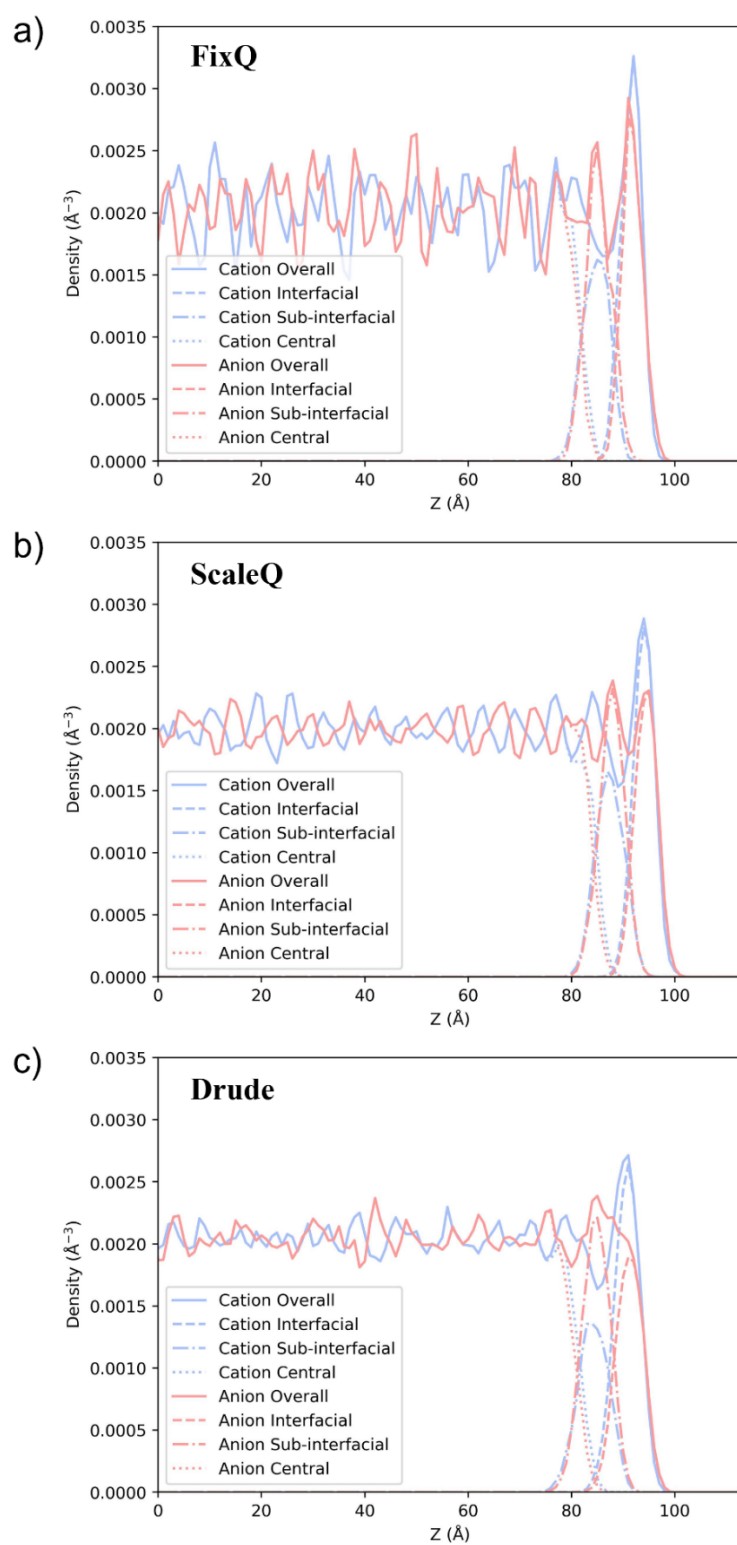

**Figure S2.** Number density profiles for the center of mass (COM) of cations and anions using a) FixQ, b) ScaleQ, and c) Drude models, with the liquid phase thickness of  $\sim 190$  Å.

**Table S1.** The residence time of cations and anions in the interfacial and sub-interfacial layers using the FixQ model.

| Residence Time (ns) | Cation Interfacial | Cation Sub-interfacial | Anion Interfacial | Anion Sub-interfacial |
|---------------------|--------------------|------------------------|-------------------|-----------------------|
| System # 1          | 36.1<br>±6.6       | 5.71<br>±0.85          | 22.7<br>±3.2      | 14.2<br>±1.1          |
| System # 2          | 36.5<br>±5.4       | 5.97<br>±0.38          | 21.4<br>±1.8      | 12.5<br>±1.0          |
| System # 3          | 38.6<br>±4.6       | 6.09<br>±1.13          | 23.6<br>±3.4      | 14.3<br>±2.6          |

**Table S2.** The residence time of cations and anions in the interfacial and sub-interfacial layers using the ScaleQ model.

| Residence Time (ns) | Cation Interfacial | Cation Sub-interfacial | Anion Interfacial | Anion Sub-interfacial |
|---------------------|--------------------|------------------------|-------------------|-----------------------|
| System # 1          | 5.31<br>± 0.33     | 1.22<br>±0.06          | 4.97<br>±0.14     | 2.18<br>±0.25         |
| System # 2          | 5.46<br>±0.23      | 1.20<br>±0.07          | 5.32<br>±347.26   | 2.46<br>±0.23         |
| System # 3          | 5.00<br>±0.35      | 1.10<br>±0.07          | 5.26<br>±0.46     | 2.46<br>±0.15         |

**Table S3.** The residence time of cations and anions in the interfacial and sub-interfacial layers using the Drude model.

| Residence Time (ns) | Cation Interfacial | Cation Sub-interfacial | Anion Interfacial | Anion Sub-interfacial |
|---------------------|--------------------|------------------------|-------------------|-----------------------|
| System # 1          | 4.52<br>±0.17      | 0.819<br>±0.020        | 3.16<br>±0.08     | 1.61<br>±0.11         |
| System # 2          | 4.82<br>±0.19      | 0.841<br>±0.029        | 3.36<br>±0.16     | 1.69<br>±0.09         |
| System # 3          | 4.32<br>±0.23      | 0.810<br>±0.050        | 3.19<br>±0.30     | 1.66<br>±0.04         |
